# Supplementary material
Source: MDPI journal article supplement (https://www.mdpi.com/2071-1050/10/3/638)
Supplement: s1 [file s1]

Supplemental Materials

Table S1. *Silphium integrifolium* accessions acquired by The Land Institute 1999-2013

| **Accession number** | **Date Acquired** | **Collector/source** | **Collected Population** | | | | | | | |
| --- | --- | --- | --- | --- | --- | --- | --- | --- | --- | --- |
|  |  |  | **State** | **County** | **Township** | **Nearest Town** | **Location notes** | **Nearest Road** | **latitude, longitude** | **Notes** |
| 16011 | 1999 | The Land Institute, Salina KS | Mo |  |  |  |  |  |  | Commercial seed source: Sharp Bros. Seed., batch EYR-4002-M |
| 16013 | 2000 | The Land Institute, Salina KS | KS | Saline | Walnut | Salina |  | WaterWell | 38.768468, -97.567252 | Collected from a restored prairie |
| 16016 | 2000 | The Land Institute, Salina KS | KS | Sedgwick | Sedgwick | Sedgwick |  | S. Hoover Rd | 37.9667, -97.408875 |  |
| 16015 | 2002 | The Land Institute, Salina KS | KS | Lincoln | Orange | Ash Grove |  | E Rd | 39.1708, -98.3500 |  |
| 16032 | 2002 | The Land Institute, Salina KS | KS | Saline | Walnut | Salina |  | Mentor Rd. | 38.74165, -97.57525 | Collected from a restored prairie |
| 16034 | 2002 | The Land Institute, Salina KS | KS | Dickinson | Noble | Chapman |  | K18 | 39.031017, -97.02365 |  |
| 16037 | 2002 | The Land Institute, Salina KS | KS | Pottawatomie | Blue | Manhattan |  | Spillway Park | 39.267083, -96.576383 |  |
| 16039 | 2002 | The Land Institute, Salina KS | KS | Pottawatomie | Union | Westmoreland |  | K99 | 39.35615, -96.38345 |  |
| 16042 | 2002 | The Land Institute, Salina KS | KS | Pottawatomie | Louisville | Wamego |  | K99 | 39.298867, -96.3395 |  |
| 16043 | 2002 | The Land Institute, Salina KS | KS | Wabaunsee | Wabaunsee | Wamego |  | K99 | 39.132167, -96.2995 |  |
| 16049 | 2002 | The Land Institute, Salina KS | KS | Marion | Blaine | Tampa |  | Tampa-Dillon Rd | 38.58975, -97.150883 |  |
| 16050 | 2002 | The Land Institute, Salina KS | KS | Saline | Smoky View | Assaria |  | Old Hwy 81 | 38.647733, -97.611583 |  |
| 16052 | 2002 | The Land Institute, Salina KS | KS | Marion | Peabody | Peabody |  | 60th St. | 38.15975, -97.076917 |  |
| 16054 | 2002 | The Land Institute, Salina KS | KS | Chase | Cedar | Burns |  | 40 Rd | 38.1294, -96.800667 |  |
| 16055 | 2002 | The Land Institute, Salina KS | KS | Chase | Homestead | Matfield Green |  | 80 Rd and J Rd | 38.1881, -96.694583 |  |
| 16057 | 2002 | The Land Institute, Salina KS | KS | Chase | Matfield | Matfield Green |  | Little Cedar Rd | 38.159083, -96.54235 |  |
| 16061 | 2002 | The Land Institute, Salina KS | KS | Chase | Bazaar | Bazaar |  | T Rd | 38.290783, -96.520717 |  |
| 16063 | 2002 | The Land Institute, Salina KS | KS | Chase | Falls | Cottonwood Falls |  | T Rd | 38.334167, -96.520333 |  |
| 16065 | 2002 | The Land Institute, Salina KS | KS | Saline | Smoky View | Assaria |  | Old Hwy 81 | 38.649967, -97.611567 |  |
| 16067 | 2002 | The Land Institute, Salina KS | KS | Saline | Walnut | Salina |  | Water Well Rd | 38.7713, -97.5669 |  |
| 16073 | 2002 | The Land Institute, Salina KS | KS | Saline | Walnut | Salina |  | Water Well Rd | 38.769133, -97.567383 |  |
| 16074 | 2002 | The Land Institute, Salina KS | KS | Saline | Walnut | Salina |  | Water Well Rd | 38.775842, -97.565466 |  |
| S13.1 | 2013 | The Land Institute, Salina KS | KS | Saline | Walnut | Salina | Wauhob Prairie, top | Water Well Rd | 38.769239, -97.567588 |  |
| S13.2 | 2013 | The Land Institute, Salina KS | KS | Saline | Walnut | Salina | Wauhob Prairie, west slope | Water Well Rd | 38.769239, -97.567588 |  |
| S13.3 | 2013 | The Land Institute, Salina KS | KS | Saline | Walnut | Salina | Wauhob Prairie, north slope | Water Well Rd | 38.769239, -97.567588 |  |
| S13.4 | 2013 | The Land Institute, Salina KS | KS | Saline | Walnut | Salina | "The 160 Prairie", east edge of the bottomland | Water Well Rd | 38.771196, -97.566804 | Foliage brown |
| S13.5 | 2013 | The Land Institute, Salina KS | KS | Geary | Ashland | Manhattan | Konza Prairie, roadsides near research buildings and staff housing | Konza Prairie Ln | 39.103022, -96.606021 | Most seeds shattered, foliage brown |
| S13.7 | 2013 | The Land Institute, Salina KS | KS | Geary | Ashland | Manhattan | Konza Prairie, roadsides near research buildings and staff housing | Konza Prairie Ln | 39.103022, -96.606021 | Plants with unshattered heads |
| S13.8 | 2013 | The Land Institute, Salina KS | KS | Geary | Ashland | Manhattan | Konza Prairie, SW part of first loop of hiking trail | Konza Prairie Ln | 39.105900, -96.598974 | Foliage green |
| S13.9 | 2013 | The Land Institute, Salina KS | KS | Saline | Smoky View | Bridgeport | 3 miles N of Bridgeport | Old Hwy 81 | 38.669336, -97.612467 |  |
| S13.11 | 2013 | Everwilde Farms | WI |  |  |  | "Origin: Wisconsin" |  |  | Commercial seed source |
| S13.13 | 2012 | Prairie Moon Nursery, Winona MN | MN |  |  |  |  |  |  | Commercial seed source |
| S13.15 | 2013 | Shooting Star Native Seeds, Georgetown KY | MN |  |  |  | "Genetic Origin: Iowa" |  |  | Commercial seed source |
| S13.16 | 2012 | Prairie Nursery, Westfield WI | WI |  |  |  |  |  |  |  |
| S13.22 | 2013 | Kika de la Garza Plant Materials Center, Kingsville TX | TX | Goliad |  |  |  | FM883 x Lazy F Rd | 28.547216, -97.6306 |  |
| S13.23 | 2013 | Kika de la Garza Plant Materials Center, Kingsville TX | TX | Dewitt |  |  | sandy | Alt Hwy 77 | 29.244633, -97.204833 |  |
| S13.25 | 2013 | Kika de la Garza Plant Materials Center, Kingsville TX | TX | Victoria |  |  | w. side of road |  | 28..87783, -97.247483 |  |
| S13.26 | 2013 | Shaw Nature Reserve, Missouri Botanical Garden, St. Louis MO | MO | Crawford |  |  |  |  |  |  |
| S13.27 | 2013 | Shaw Nature Reserve, Missouri Botanical Garden, St. Louis MO | MO | Phelps |  |  |  |  |  |  |
| S13.28 | 2013 | Ray Ribich | IL | DuPage |  | Glen Ellyn | backyard | Sequoia Dr. | 41.826667, -88.058056 | Restored prairie; seed from same county |
| S13.29 | 2013 | Bill Brighoff | MO |  |  |  |  |  |  | Original plant purchased at Shaw Nature Reserve |
| S13.30 | 2013 | Dropseed Native Plant Nursery, Goshen KY | KY |  |  |  |  |  |  | Commercial seed source |
| S13.31 | 2013 | Lincoln University Cooperative Extension | MO |  |  |  |  |  |  |  |
| S13.32 | 2013 | Aldo Leopold Foundation, Baraboo WI | WI | Sauk | Fairfield | Baraboo |  | Levee Rd | 43.557367, -89.638184 |  |
| S13.36 | 2013 | Calvin College, Grand Rapids MI | MI | Kent |  | Grand Rapids | Calvin College campus |  | 42.930783, -85.589017 | Restored prairie, original collection: a county park in Berrien County, MI |
| S13.37 | 2013 | Powell Gardens, Kingsville MO | MO | Pettis | Lake Creek | Bahner | Ona Gieschen's native prairie |  | 38.600547, -93.106116 |  |
| S13.38 | 2013 | Stephanie Frischie | IN | Newton | Beaver | Morocco | Home landscaping | 300 St. | 40.955912, -87.352427 | Restored prairie,original seed from NW IN |
| S13.39 | 2013 | Prairie Earth Nursery, Bradford IL | IL | Peoria |  |  |  |  |  | Seed from a single, shatter resistant plant |
| S13.40 | 2013 | Applied Ecological Services Inc., Brodhead WI | WI | Rock |  |  |  |  |  | Commercial seed source |
| S13.41 | 2013 | Applied Ecological Services Inc., Brodhead WI | IL | Winnebago |  |  |  |  |  | Commercial seed source |
| S13.42 | 2013 | Applied Ecological Services Inc., Brodhead WI | WI | Green |  |  |  |  |  | Commercial seed source |
| S13.43 | 2013 | Applied Ecological Services Inc., Brodhead WI | WI | Iowa |  |  |  |  |  | Commercial seed source |
| S13.44 | 2013 | Blazing Star Nursery, Woodstock IL | IL | McHenry |  |  |  |  |  | Commercial seed source |
| S13.45 | 2013 | Lois Albrecht | IA |  |  |  |  |  |  | Drought resistant |
| S13.46 | 2013 | Anon | OH |  |  |  |  |  |  |  |
| S13.47 | 2013 | Powell Gardens, Kingsville MO | MO | Johnson | Jackson | Kingsville | Powell Gardens | NW US 50 | 38.869905, -94.041707 | 12 late-shattering plants from a naturalized population |
| S13.48 | 2013 | Missouri Prairie Foundation, Columbia MO | MO | Vernon | Richland | Richards | Stilwell Prairie | Z Rd | 37.935252, -94.549995 |  |
| S13.49 | 2013 | Missouri Prairie Foundation, Columbia MO | MO | Vernon | Drywood | Nevada | Osage Prairie Conservation Area |  | 37.744419, -94.329599 |  |
| S13.50 | 2013 | Missouri Prairie Foundation, Columbia MO | MO | Vernon | Center | Nevada | Little Osage Prairie |  | 37.648048, -94.348514 |  |
| S13.51 | 2013 | Missouri Prairie Foundation, Columbia MO | MO | Vernon | Union | Sheldon |  |  |  |  |
| S13.52 | 2013 | Eric Preston | WI |  |  |  |  |  |  |  |
| S13.53 | 2013 | Bridging the Gap, Kansas City MO | MO | Jackson |  |  | Jerry Smith Park |  | 38.882533, -94.570814 |  |
| S13.54 | 2013 | Shoestring Acres Seed, Lincoln NE | NE | Lancaster and Antelope |  |  | Hwy 79 |  |  | Commercial seed source |
| S13.57 | 2013 | Hamilton Native Outpost, Elk Creek MO | MO |  |  |  |  |  |  | Commercial seed source |

Table S2. Traits measured in breeding nurseries at The Land Institute, 2007-2017.

| Year planted | Season established | Year measured | Trait (unit) 1 | Heritability estimate 2 | ANOVA3 | | | | Population trait values | | | | | | | |
| --- | --- | --- | --- | --- | --- | --- | --- | --- | --- | --- | --- | --- | --- | --- | --- | --- |
| Entry | | Block | | Field 14 | | | | Field 2 5 | | | |
| vr | df | vr | df | Num | Mean (St.dev) | Min | Max | Num | Mean (St.dev) | Min | Max |
| 2015 | Fall | 2016 | Foliage health (score, 0-10) | 0.70 | 6.23*** | 39 |  |  | 383 | 4.41(1.7) | 0 | 9 |  |  |  |  |
| 2015 | Fall | 2017 | Growth stage, 19 June | 0.54 | 3.48*** | 39 |  |  | 382 | 3.77(0.50) | 3 | 6 |  |  |  |  |
| 2015 | Fall | 2016 | Growth stage, 22 July |  | 1.8** | 48 | 51*** | 1 | 383 | 21.1(7.7) | 9 | 71 | 400 | 17.2(7.9) | 5 | 69 |
| 2015 | Fall | 2016 | Heads per stalk (number) |  | NS | 48 | 8.43** | 1 | 383 | 1.45(5.9) | 0 | 58 | 403 | 0.533(2.0) | 0 | 17 |
| 2015 | Fall | 2017 | Height of lowest branch (dm) |  | 2.73*** | 39 |  |  | 381 | 6.19(3.9) | 10 | 220 |  |  |  |  |
| 2015 | Fall | 2017 | Nodes per stalk (number) |  | 2.19*** | 48 | 562*** | 1 | 382 | 22.2(2.4) | 8 | 29 | 400 | 17.1(3.6) | 1 | 26 |
| 2015 | Fall | 2017 | Normal leaf shape (visual score, 0-10) | 0.57 | 5.04*** | 48 | 341*** | 1 | 382 | 6.92(1.7) | 3 | 9 | 388 | 4.89(1.7) | 2 | 9 |
| 2015 | Fall | 2017 | Plant height (dm) | 0.46 | 5.08*** | 48 | 1178*** | 1 | 382 | 18.2(2.6) | 5 | 24 | 402 | 12.5(2.6) | 1 | 18 |
| 2015 | Fall | 2017 | Rust resistance (visual score, 0-10) | 0.59 | 6.40*** | 48 | 2.89* | 1 | 382 | 7.12(1.8) | 4 | 10 | 402 | 7.28(1.3) | 4 | 10 |
| 2015 | Fall | 2017 | Stem diameter (mm) |  | 1.81*** | 48 | 2973*** | 1 | 382 | 16.8(2.8) | 6 | 28 | 402 | 8.02(1.8) | 2 | 13 |
| 2015 | Fall | 2017 | Erectness. Oct. 18 (visual score, 0-10) | 0.41 | 2.78*** | 48 |  |  | 381 | 0.871(1.4) | 0 | 8 |  |  |  |  |
| 2015 | Fall | 2017 | Erectness, Sep. 22 (visual score, 0-10) | 0.39 | 2.70*** | 48 |  |  | 379 | 2.67(1.8) | 0 | 9 |  |  |  |  |
| 2015 | Fall | 2017 | Maturity (5 harvest dates, 1=earliest) | 0.44 | 2.58*** | 48 |  |  | 335 | 3.58(0.93) | 1 | 5 |  |  |  |  |
| 2015 | Fall | 2017 | Stems per plant (number) | 0.43 | 3.73*** | 48 | 264*** | 1 | 382 | 9.14(3.1) | 1 | 21 | 402 | 6.2(2.2) | 1 | 13 |
| 2015 | Spring | 2016 | Achene weight (mg) | 0.21 | 1.51*** | 126 |  |  | 1006 | 23.9(5.0) | 10 | 41 |  |  |  |  |
| 2015 | Spring | 2016 | Achenes per head (number) |  | N.S. | 126 |  |  | 925 | 33.5(10.84) | 0.5 | 98 |  |  |  |  |
| 2015 | Spring | 2016 | Receptacle diameter (mm) | 0.23 | 1.34* | 126 |  |  | 803 | 7.79(1.3) | 4 | 16 |  |  |  |  |
| 2015 | Spring | 2016 | Emergence vigor (visual score, 0-10) |  | 1.34* | 126 |  |  | 1129 | 3.77(0.98) | 1 | 6 |  |  |  |  |
| 2015 | Spring | 2016 | Erectness (visual score, 0-10) | 0.18 | 1.43** | 126 |  |  | 1046 | 6.65(0.74) | 2 | 9 |  |  |  |  |
| 2015 | Spring | 2016 | Foliage health (visual score, 0-10) | 0.24 | 1.66*** | 126 |  |  | 1067 | 3.57(2.1) | 0 | 9 |  |  |  |  |
| 2015 | Spring | 2017 | Growth stage, 14 Jun | 0.23 | 1.74*** | 126 |  |  | 1112 | 3.62(0.383) | 2.9 | 6 |  |  |  |  |
| 2015 | Spring | 2016 | Harvest index (percent) |  | 1.39** | 126 |  |  | 784 | 9.78(4.4) | 0 | 26 |  |  |  |  |
| 2015 | Spring | 2016 | Head Biomass (g per head) |  | 1.32* | 126 |  |  | 790 | 55.6(23) | 0 | 153 |  |  |  |  |
| 2015 | Spring | 2016 | Head yield (g achenes per head) |  | N.S. | 126 |  |  | 933 | 0.795(0.25) | 0 | 1.69 |  |  |  |  |
| 2015 | Spring | 2017 | Nodes per stalk (number) | 0.23 | 1.64*** | 126 |  |  | 1110 | 20.1(2.9) | 2 | 33 |  |  |  |  |
| 2015 | Spring | 2017 | Normal leaf shape (visual score, 0-10) | 0.31 | 1.84*** | 126 |  |  | 1095 | 5.80(1.6) | 2 | 9 |  |  |  |  |
| 2015 | Spring | 2016 | Plant height (dm) | 0.15 | 1.38** | 126 |  |  | 1124 | 14.4(4.3) | 1 | 23 |  |  |  |  |
| 2015 | Spring | 2016 | Reproductive effort (visual score, 0-10) | 0.19 | 1.53*** | 126 |  |  | 1123 | 3.07(1.6) | 1 | 7 |  |  |  |  |
| 2015 | Spring | 2016 | Reproductive effort (visual score, 0-10) | 0.19 | 1.53*** | 126 |  |  | 1124 | 3.07(1.6) | 0 | 7 |  |  |  |  |
| 2015 | Spring | 2017 | Rust resistance (visual score, 0-10) | 0.66 | 4.62*** | 126 |  |  | 1109 | 6.44(2.0) | 3 | 10 |  |  |  |  |
| 2015 | Spring | 2015 | Seedling vigor (visual score, 0-10) | 0.17 | 1.45** | 126 |  |  | 1080 | 2.58(1.1) | 1 | 6 |  |  |  |  |
| 2015 | Spring | 2016 | Stalk biomass (g per stalk) | 0.17 | 1.38** | 126 |  |  | 1006 | 131(78) | 2 | 504 |  |  |  |  |
| 2015 | Spring | 2017 | Stalk diameter (mm) |  | N.S. | 126 |  |  | 1110 | 12.4(3.6) | 2 | 63 |  |  |  |  |
| 2015 | Spring | 2016 | Stalk diameter (mm) |  | 1.12 | 126 |  |  | 1125 | 13.6(3.7) | 1 | 23 |  |  |  |  |
| 2015 | Spring | 2017 | Stalk height (dm) |  | N.S. | 126 |  |  | 1110 | 16.3(2.9) | 2 | 23 |  |  |  |  |
| 2015 | Spring | 2016 | Stalk height (dm) | 0.15 | 1.38** | 126 |  |  | 1125 | 14.4(4.3) | 1 | 23 |  |  |  |  |
| 2015 | Spring | 2016 | Stalk yield (g achenes per stalk) |  | 1.1 | 126 |  |  | 1017 | 16.4(8.9) | 0 | 62 |  |  |  |  |
| 2015 | Spring | 2017 | Stalks per plant (number) | 0.21 | 1.32* | 126 |  |  | 1110 | 8.66(3.7) | 1 | 26 |  |  |  |  |
| 2014 | Spring | 2016 | Erectness (visual score, 0-10) | 0.40 | 2.85*** | 462 |  |  | 5241 | 6.48(1.0) | 2 | 9 |  |  |  |  |
| 2014 | Spring | 2016 | Foliage health (visual score, 0-10) | 0.62 | 5.4*** | 463 |  |  | 5305 | 3.87(1.7) | 0 | 9 |  |  |  |  |
| 2014 | Spring | 2016 | Growth stage, late June | 0.37 | 2.52*** | 464 |  |  | 5397 | 3.69(.74) | 2 | 6 |  |  |  |  |
| 2014 | Spring | 2015 | Growth stage, mid June | 0.34 | 2.69*** | 465 |  |  | 5466 | 3.4(.71) | 1 | 6 |  |  |  |  |
| 2014 | Spring | 2015 | Lodging2015, early July (visual score, 0-10) | 0.41 | 1.87*** | 272 |  |  | 1252 | 4.7(0.72) | 1 | 7 |  |  |  |  |
| 2014 | Spring | 2016 | Reproductive effort (visual score, 0-10) | 0.45 | 3.21*** | 463 |  |  | 5308 | 1.87(1.4) | 0 | 10 |  |  |  |  |
| 2014 | Spring | 2015 | Rust resistance (visual score, 0-10) | 0.50 | 4.0*** | 465 |  |  | 5369 | 1.19(1.4) | 0 | 10 |  |  |  |  |
| 2014 | Spring | 2016 | Rust severity (visual score 0-10) | 0.48 | 3.5*** | 466 |  |  | 5369 | 1.19(1.4) | 0 | 10 |  |  |  |  |
| 2013 | Spring | 2014 | Achene weight (mg) | 0.47 | 2.4*** | 95 | 7.67*** | 2 | 578 | 24.9(4.1) | 11 | 43 |  |  |  |  |
| 2013 | Spring | 2014 | Erectness (visual score, 0-10) | 0.40 | 9.9*** | 104 | 5.8* | 2 | 5648 | 2.28(1.0) | 1 | 5 |  |  |  |  |
| 2011 | Spring | 2013 | Achene weight (mg) | 0.51 | 7.02*** | 103 | 12.17*** | 4 | 1964 | 17.1(4.3) | 1 | 36 |  |  |  |  |
| 2011 | Spring | 2012 | Achene weight (mg) | 0.59 | 7.54*** | 104 | 3.41** | 4 | 2557 | 15.62(3.3) | 6 | 30 |  |  |  |  |
| 2011 | Spring | 2012&2013 | Achene weight, 2-yr average (mg) | 0.59 | 7.42*** | 103 | 3.51** | 4 | 1967 | 16.2 | 1 | 29 |  |  |  |  |
| 2011 | Spring | 2013 | Head yield (g achenes per head) | 0.36 | 3.66*** | 103 | 12.33*** | 4 | 1949 | 0.289(0.16) | 0 | 1.2 |  |  |  |  |
| 2011 | Spring | 2012 | Ligules per head (number) | 0.78 | 8.52*** | 103 | NS | 4 | 1968 | 51.7(14) | 6 | 165 |  |  |  |  |
| 2011 | Spring | 2012 | Stalk yield (g achenes per stalk) | 0.27 | 5.03*** | 104 | 1.33 | 4 | 2583 | 3.46(2.3) | 0 | 20 |  |  |  |  |
| 2007 | Spring | 2008 | Stalks per plant (number) |  | 1.08 | 228 | 7.85*** | 4 | 1924 | 1.38(0.82) | 0 | 6 |  |  |  |  |
| 2007 | Spring | 2008 | Achene weight (mg) | 0.27 | 1.63*** | 223 | 6.46*** | 4 | 1559 | 23.8(4.0) | 1 | 43 |  |  |  |  |
| 2007 | Spring | 2008 | Head yield (g achenes per head) | 0.13 | 1.28** | 226 | 6.17*** | 4 | 1569 | 0.423(0.14) | 0 | 1 |  |  |  |  |
| 2007 | Spring | 2008 | Plant height (dm) |  | 1.03 | 227 | 29.22** | 4 | 1697 |  | 3.5 | 22 |  |  |  |  |
| 2007 | Spring | 2008 | Stalk diameter (mm) |  | 1.16 | 225 | 31.66*** | 4 | 1733 | 9.78(3.6) | 2 | 20 |  |  |  |  |
| 2007 | Spring | 2008 | Stalk yield (g achenes per stalk) |  | 1.11 | 224 | 37.42*** | 4 | 1584 | 11.0(10) | 0 | 83 |  |  |  |  |

1. Traits: Please refer to the trait table (S3)

2. Heritability estimate: Only estimates where the standard error of the genetic (half-sib family) effect was less than half of the estimated effect are shown. Family effects and the residual error terms were estimated using the REML Variance Component process of Genstat (VSN International, Hemel Hempstead, UK) The estimate is for narrow sense heritability based on the individual plant phenotypes from half-sib families [1]. Block, row, range or other spatial terms were occasionally used as covariates in the model to reduce the residual effect but only when doing so also reduced the Akaike Information Criterion value. FP2015 includes both half-sib and full-sib families so the additive portion of the genetic variation may be overestimated. Values for FP2015 are for both locations when traits were measured in both locations.

3. ANOVA: ANOVAs using breeding nursery entries (members of an entry are full or half-siblings to each other, the result of controlled crossing or open pollination of a common mother plant) and block (unit of replication within a field or in two fields in Fall 2015) as the main effects were performed using Genstat’s Unbalanced ANOVA process. Differences between entries are suggestive of genetic variation, while significant block effects demonstrate that the trait is influenced by subtle environmental differences that could include soil, slope, or time of harvesting/observation (as we tried to score or harvest each block at the same time). Abbreviations: vr, variance ratio (similar to the F value), * p<0.05, ** p<0.01, *** p<.001. df, degrees of freedom.

4. Field 1 is the main research farm of The Land Institute in Salina KS.

5. Field 2 is a new field added to the research farm in 2015. It is immediately west of Field 1, but has a different cropping history (continuous wheat) which may explain the compacted soil and poor drainage which in turn may explain why plant productivity is lower.

Table S3. Trait definitions for *Silphium integrifolium* breeding.

| Trait | Units | Time of measurement (Kansas) | Methods | Notes |
| --- | --- | --- | --- | --- |
| Achene weight | mg | Post-harvest | Seeds dried at room temperature; 10-50 filled achenes are separated from any debris and weighed as a group. The average achene weight is calculated from this weight | Increasing achene mass is a high priority both as a yield component and because larger seeds are expected to be easier to clean and plant than small ones. |
| Erectness. | visual score, 0-10 | After most heads are mature (September-October) or earlier if there is unusual lodging due to wind or wet conditions | This score integrates stalk angle (with 10 being perpendicular to the ground and 0 being parallel to the ground), stalk straightness (with 10 being perfectly straight and 0 being bent in a U shape) and lodging incidence (with 10 being 100% erect stalks and 0 being no erect stalks). | In the absence of stem boring insects, full lodging (stems laying on the ground or broken off) is rare but stem curvature and leaning is common but undesirable because stems can tangle during harvesting. With intense insect damage, nearly all stems eventually lodge but some genets lodge much earlier than others. Delaying lodging until after harvest may be achievable. |
| Foliage health | score, 0-10 | June-August; early scoring dates emphasize rust resistance, late scores may integrate multiple hazard. | Estimate the proportion of the leaf lamina (blade) that appears undamaged (damage can include herbivory, necrosis, fungal lesions) where 0=no healthy lamina remaining and 10=100% of lamina appears healthy | Select for plants with genetic or physical resistance to herbivores, wind and disease. |
| Growth stage, 19 June | developmental stage, see S4 | Any time between spring emergence and autumn dormancy | Use the most advanced stalk (ramet) or head to score the developmental stage of the whole plant (genet) | Mostly for information at this point. It is not clear whether early flowering is desirable or not. |
| Harvest index | proportion | Post-harvest | Bag heads on 1-3 stalks as described for Stalk Yield. Cut the entire stalk instead of just the stalk immediately below the bag. Dry the stalks with bags attached at RT and weigh the entire bundle. Divide the weight of achenes by the bundle net weight (gross weight minus the weight of bag and any twine or ties). | Achieving a higher harvest index rather than merely higher seed yield should improve the water and fertilizer productivity of the crop. |
| Head yield | g achenes per head | Post-harvest | Most commonly, 3 heads representative of the secondary heads in the corymb-like flowering branches are hand-harvested into a separate envelope prior to shattering. The other method is to harvest all heads on a stalk (see Stalk Yield), and count the number of heads. In either case, Head Yield is the mass of the harvested seed divided by the number of heads harvested together. | We are more interested in increasing the yield potential of heads than of plants or stalks because fewer, more productive heads could be one route to achieving greater synchrony of maturation and uniformity of head height. |
| Heads per stalk | number | August-September | Count the number of heads within the mesh bag enclosing the harvestable heads from 1-3 stalks. | Use this number to estimate average yield per head. |
| Height of lowest branch | dm | Any time after first anthesis | For a stalk with branching pattern representative of the majority of stalks of the genet, measure from the base of the stalk to the base of the lowest branch | Fewer, later (higher) branches could be one way to reduce the plasticity of the plant and increase synchronicity of flowering and seed maturation. |
| Ligules per head | Number | Late June, early July | 2-3 of the largest-looking heads with expanded ligules (the single long yellow petal of a ray floret) are identified for each plant and the number of ligules counted. The highest number is recorded. | There are many reasons why some heads on the same plant have fewer ligules than others (shading, insect damage, etc.) but the upper limit seems to be constrained by genetics. |
| Lodging2015 | visual score, 0-10 | Any time, see erectness, above | This score is simply the inverse of Erectness. |  |
| Nodes per stalk | number | Any time after first anthesis | For the tallest stalk (ramet) of the genet, count the number of visible nodes from ground level to the oldest (earliest) inflorescence. | Selection for reduced number of nodes could help reduce plant height and number of leaves and increase harvest index. |
| Normal leaf shape | visual score, 0-10 | June-July | Score degree of similarity to healthy silphium leaves, where 10 is perfectly normal leaf shape and venation, 0 is a leaf with no lamina. | Some plants produce disfigured leaves in the spring. These leaves are narrow with large, thick, chlorotic veins and reduced interveinal laminas. Leaves produced earlier and later in the season are often normal. The cause of this phenomenon is unknown. In severe cases, the apical meristems above such leaves abort. |
| Plant height | dm | Any time after the height of anthesis (July); stems stop growing as they begin flowering | Measure the height of the tallest ramet per genet. | Reducing plant height is an important goal for improving harvestability and harvest index, and reducing lodging. |
| Reproductive effort | visual score, 0-10 | After the peak of flowering but before shattering and lodging (August) | A quick visual proxy for harvest index, focusing on the size and number of heads compared with the apparent aboveground biomass. |  |
| Rust resistance | visual score, 0-10 | Late spring (June) | This score integrates rust severity (roughly, the size and morphology of pustules and their effect on surrounding leaf tissue) and incidence (number of affected leaves and number of lesions per leaf). A score of 10 indicates no rust symptoms and 0 means all leaves appear to be fully impaired. High scores (8-9) can be achieved by either very rare normal pustules or a greater number of extremely small lesions or blemishes that may points of spore germination but not pustule development. | The overall goal is to achieve a level of resistance where leaf function is not detectably impaired, but we are currently agnostic about whether reducing severity or incidence is the best approach. |
| Seedling vigor, emergence vigor | visual score, 0-10 | After seedlings recover from transplanting in first season and before widespread bolting (rosette stage) in subsequent seasons (emergence vigor) | This score is used to compare plants within one population at one time point. It integrates the size of leaves and number of leaves. A score of zero means no live foliage can be seen. Occasionally plants given a zero score in the first year regrow in the second year. A score of 5 indicates a plant of the expected vigor given the conditions. Smaller, weaker plants are given scores between 1 and 4 with 1 indicating a seedling that is probably dying. Scores of 9-10 have not been recorded but could be in the future as seedling vigor appears to be increasing. | This score can be used to identify experimental error or poor soil conditions resulting in excessive transplanting shock. Heritable differences may indicate differences in seedling relative growth rate. |
| Stalk yield | g achenes per stalk | post-harvest | Nylon mesh bags approximately 30 cm x 50 cm are placed over 1-3 stalks before shattering begins on the first heads and secured with a disposable cable tie. Bags are harvested after all heads have turned brown and the contents later threshed and cleaned. | Heads too low on the stalk to be contained by the bag or those flowering too late (i.e., prevented from being pollinated by the bag) are not included in Stalk Yield. Thus, this trait is more about mechanically harvestable seed yield than about potential reproductive effort. |
| Stalks per plant | number | June-October; number remains constant after bolting in late spring | Count the number of elongated (bolted) stalks emerging from a single crown. Ignore very late, slender stalks. | Mostly for information; no clear selection preference at this point. This number can be used to extrapolate data from yield per stalk to yield per plant. |
| Stem diameter | mm | Any time after initiation of anthesis; stems do not seem to increase in girth after that point | Unless otherwise noted, measure the internode diameter of the primary stem (main stalk) of one of the widest, healthiest ramets at approximately one half the height of that stalk. If stems are irregular in cross-section, measure in the widest direction. Use calipers. | Larger stems require slower mechanical harvesting due to the potential to plug the harvester. Ideally, we would like to reduce stem diameter. |

Table S4. *Silphium integrifolium* Growth stages

| Stage |  | Notes | Comparable sunflower stage[2] |
| --- | --- | --- | --- |
| **0** | **Seed/seedling** |  |  |
| 0.0 | Imbibed seed |  |  |
| 0.1 | First sign of radicle protruding |  |  |
| 0.3 | Hypocotyl first visible |  |  |
| 0.5 | Cotyledons emerged & fully expanded |  | VE |
| 0.7 | First true leaf fully expanded |  | V |
| 0.9 | Several true leaves |  |  |
| **1** | **Rosette** | This stage also occurs early in the spring in subsequent years |  |
| 1.1 | First stage that all expanded leaves are leaning away from the center | Seedling leaves are erect, rosette leaves lean and radiate outwards |  |
| 1.3-1.9 | Growth of rosette in leaf size and number of leaves | The score is relative, absolute growth will vary depending upon the growing conditions and season length |  |
| **2** | **Bolting** | After the first year, multiple stalks bolt from the crown/rosette |  |
| 2.1 | First sign of shoot apex above ground |  |  |
| 2.3-2.9 | Growth of stalk in height and number of nodes | Again, the score is relative. Shoot apex remains completely vegetative |  |
| **3** | **Capitulum** |  |  |
| 3.1 | Hard round bud can be barely felt (or seen?) | Bracts form a star-like pattern? This is true in sunflower but not so obvious in Silphium | R1 |
| 3.3 | Bud easily felt, may be visible | Squeeze the apex gently; if you can feel a small hard “pea” inside, it is stage 3 |  |
| 3.5 | Green bud clearly seen |  |  |
| 3.7 | Bud enlarged to full size | Judge this by comparison with nearby plants with stage 4 buds. |  |
| 3.9 | Phyllaries (bracts) gaping but no ligules visible |  |  |
| **4** | **Ligules** | Ligules are the very long, strap-like petals of ray florets | R4 |
| 4.1 | First ligules visible; usually flattened |  |  |
| 4.3 | Phyllaries curve outward, ligules elongate |  |  |
| 4.5 | All ligules visible, erect and yellow | Ligules will be small, yellow-green and erect |  |
| 4.7 | Ligules bend outward | This stage is rare; it must be brief |  |
| 4.9 | All ligules unfolded and enlarged | Anthesis of outer florets takes place before ligules reach this stage in many heads. |  |
| **5** | **Anthesis** | Appearance of the stigmas is an practical marker of anthesis | R5 |
| 5.1 | Anthesis of first floret in capitulum to 20% of florets in anthesis | Note that this stage can be reached slightly before all ligules fully unfolded or elongated |  |
| 5.3 | 21-40% of florets in anthesis |  |  |
| 5.5 | 41-60% of florets in anthesis |  |  |
| 5.7 | 61-80% of florets in anthesis |  |  |
| 5.9 | 81-100% of florets in anthesis |  |  |
| **6** | **Corolla Senescence** |  | R6 |
| 6.1 | First ligules withered, dropped or discolored to 20% of ligules senescent | Focus on the ligules because the corollas of the disk florets sometimes drop long before anthesis is even complete and in other plants, remain attached, though withered well into stage7. |  |
| 6.3 | 21-40% of ligules senescent |  |
| 6.5 | 41-60% of ligules senescent |  |
| 6.7 | 61-80% of ligules senescent |  |
| 6.9 | 81-100% of ligules senescent, but seeds not visibly enlarged |  |
| **7** | **Capitulum maturation** |  | R7 |
| 7.1 | Seeds noticeably swelling; white stylar-remains/scar of each seed visible; capitulum mostly green | Skip to this stage even if ligules are not completely senescent |  |
| 7.3 | Capitulum clearly rounded; achenes elongating and their black regions are visible; capitulum yellowing | Phyllaries the bracts that surround the back and sides of the capitulum |  |
| 7.5 | Phyllaries and receptacle bracts browning |  |  |
| 7.7 | Head brown and receptacle bracts starting to fall out |  |  |
| 7.9 | Achenes bent back and disk florets lost | At maturity, the disk florets all fall out and the seeds are bent back about 90 deg from their original orientation |  |
| **8** | **Shattering** |  |  |
| 8.1 | First seed lost, up to 20% loss | Fruits dehisce one by one as the vascular bundles connecting them to the head weaken and break |  |
| 8.3 | 21-40% seeds lost from head |  |
| 8.5 | 41-60% seeds lost from head |  |
| 8.7 | 61-80% seeds lost from head |  |
| 8.9 | 81-100% seeds lost from head |  |
| **9** | **Vegetative senescence** |  |
| 9.1 | First leaves/stems yellow or brown up to 20% leaves senescent | This stage is not meant to refer to the senescence of the bracts and leaves just below the mature heads during head maturation. It is about the end of the growing season which is usually much later. |  |
| 9.3 | 21-40% of leaves senescent |  |
| 9.5 | 41-60% of leaves senescent |  |
| 9.7 | 61-80% of leaves senescent |  |
| 9.9 | 81-100% of leaves senescent |  |

References:

1. Jayaraman, K. *A statistical manual for forestry research*; Food and Agriculture Organization, Regional Office for Asia and the Pacific: Bangkok, 2000;

2. Schneiter, A. A.; Miller, J. F. Description of Sunflower Growth Stages. *Crop Sci.* **1981**, *21*, 901–903.
